# Supplementary material for: Is Hippocampal Resection Necessary for Low-Grade Epilepsy-Associated Tumors in the Temporal Lobe?
Source: MDPI journal article supplement (doi:10.3390/brainsci12101381), 2022-10-12
Supplement: s1 [file s1]

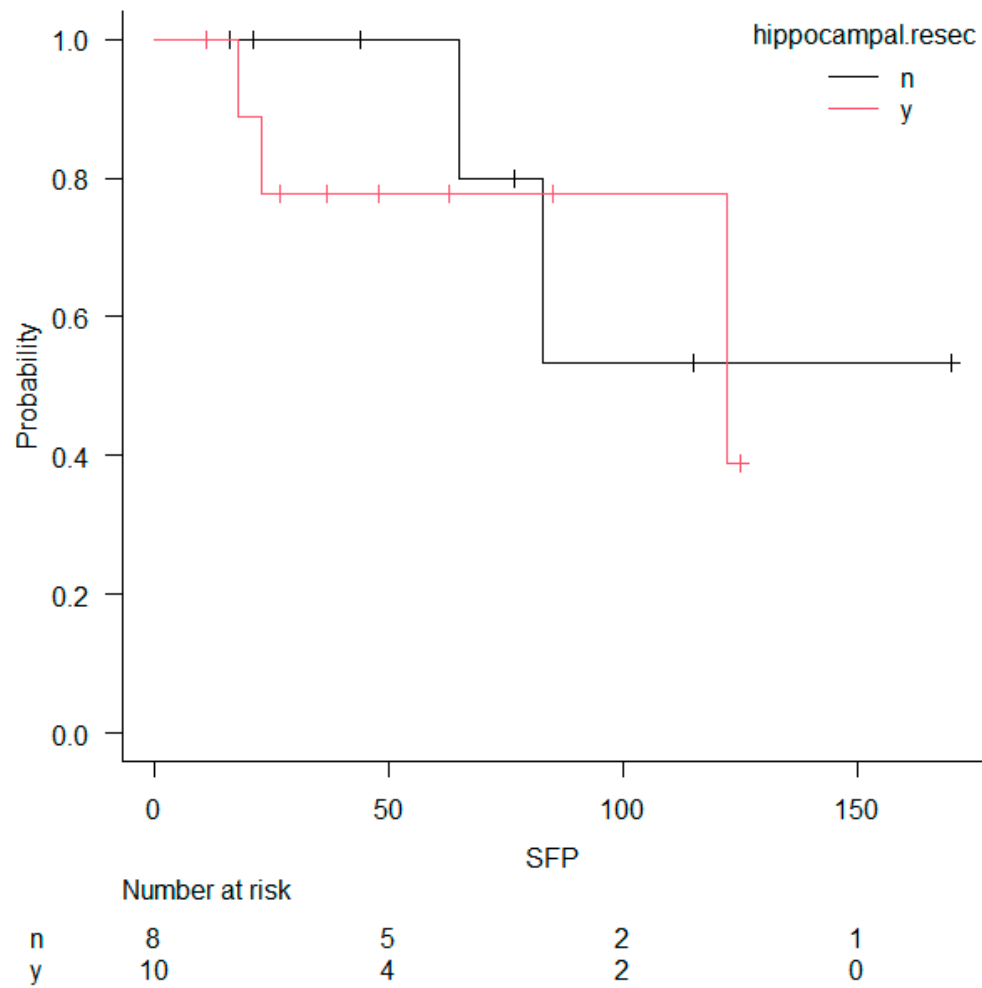

**Figure S1.** The Kaplan–Meier curve shows the seizure-free survival of patients in the Resected and Preserved groups in the limited patients with the tumor located medial to the collateral sulcus.
